# Supplementary material
Source: PubMed Central journal article supplement (PMC3660801)
Supplement: tlo0603_0319SD1.pdf [file tlo0603_0319SD1.pdf]

**Table W1.** Treatment Received for each CRC Patient before the Blood Collection.

| Sample | Treatment before Blood Collection                                                                                                                        |
|--------|----------------------------------------------------------------------------------------------------------------------------------------------------------|
| CRC1   | CT neoadjuvant 1 [oxaliplatin–5-fluorouracil (5-FU)]                                                                                                     |
| CRC2   | CT palliative 1 (oxaliplatin–egafur uracil–bevacizumab), CT 2 palliative (UFT-irinotecan-bevacizumab)                                                    |
| CRC3   | Untreated                                                                                                                                                |
| CRC4   | Untreated                                                                                                                                                |
| CRC5   | Untreated                                                                                                                                                |
| CRC6   | Untreated                                                                                                                                                |
| CRC7   | Untreated                                                                                                                                                |
| CRC8   | Untreated                                                                                                                                                |
| CRC9   | Untreated                                                                                                                                                |
| CRC10  | Untreated                                                                                                                                                |
| CRC11  | Untreated                                                                                                                                                |
| CRC12  | Untreated                                                                                                                                                |
| CRC13  | Untreated                                                                                                                                                |
| CRC14  | Untreated                                                                                                                                                |
| CRC15  | Untreated                                                                                                                                                |
| CRC16  | Untreated                                                                                                                                                |
| CRC17  | CT 1 palliative (5-FU oxaliplatin)                                                                                                                       |
| CRC18  | CT 1 palliative (5-FU irinotecan)                                                                                                                        |
| CRC19  | CT 1 palliative (5-FU), CT 2 palliative (5-FU avastin oxaliplatin), CT 3 (5-FU avastin)                                                                  |
| CRC20  | CT 1 palliative (5-FU irinotecan), CT 2 palliative (5-FU irinotecan avastin), CT 3 palliative (5-FU avastin oxaliplatin), CT 4 palliative (5-FU avastin) |
| CRC21  | CT 1 palliative (5-FU irinotecan avastin)                                                                                                                |
| CRC22  | CT 1 palliative (5-FU irinotecan), CT 2 palliative (5-FU oxaliplatin), CT 3 palliative (5-FU irinotecan avastin), CT 4 palliative (5-FU avastin)         |
| CRC23  | CT 1 palliative (irinotecan 5-FU avastin), RT 1 neoadjuvant, CT 2 palliative (5-FU avastin)                                                              |
| CRC24  | Untreated                                                                                                                                                |
| CRC25  | Untreated                                                                                                                                                |
| CRC26  | RT 1 neoadjuvant, CT 1 neoadjuvant (5-FU oxaliplatin), CT 2 neoadjuvant (5-FU irinotecan avastin), CT 3 palliative (irinotecan avastin)                  |
| CRC27  | CT 1 neoadjuvant (5-FU oxaliplatin irinotecan), RT 1 neoadjuvant                                                                                         |
| CRC28  | CT 1 (Camptothecin-Erbitux)                                                                                                                              |
| CRC29  | RT 1 neoadjuvant, CT 1 neoadjuvant                                                                                                                       |
| CRC30  | CT 1 palliative                                                                                                                                          |
| CRC31  | CT 1 palliative                                                                                                                                          |
| CRC32  | CT 1 palliative                                                                                                                                          |
| CRC33  | Untreated                                                                                                                                                |
| CRC34  | Untreated                                                                                                                                                |
| CRC35  | Untreated                                                                                                                                                |
| CRC36  | Untreated                                                                                                                                                |
| CRC37  | Untreated                                                                                                                                                |
| CRC38  | Untreated                                                                                                                                                |

RT, radiotherapy; CT, chemotherapy; the number indicates the sequence of treatment.

**Table W2.** Characteristics of the Selected Primers and of the Amplicons Obtained.

| Species         | Gene        | Primer Name           | Direction   | Sequence 5'-3'              | T <sub>m</sub> (°C) | Amplicon Size (bp)         |       |                     |
|-----------------|-------------|-----------------------|-------------|-----------------------------|---------------------|----------------------------|-------|---------------------|
| Human           | <i>KRAS</i> | KRAS Hf 2             | Sense       | AATCCGTGTGGGTCAGAGAG        | 59.4                | 189                        |       |                     |
|                 |             | KRAS Hr 2             | Antisense   | GAAACAATAGCCACCCTCCTT       | 57.9                | –                          |       |                     |
| Mouse           | <i>KRAS</i> | KRAS Mf 3             | Sense       | GGCCAGGAGTGCATTAAGAC        | 59.4                | 214                        |       |                     |
|                 |             | KRAS Mr 3             | Antisense   | GCACGTGAGATAGTCTCCAAA       | 57.9                | –                          |       |                     |
| Human           | <i>KRAS</i> | KRAS G12V f           | Sense       | ACTTGTGGTAGTTGGAGCTGT       | 59.3                | 142                        |       |                     |
|                 |             | KRAS G12V r           | Antisense   | GAATGGTCTGCACCAGTAA         | 58.6                | –                          |       |                     |
| Human           | <i>BRAF</i> | BRAF V600E f          | Sense       | GATTTTGGTCTAGCTACAGA        | 49.7                | 145                        |       |                     |
|                 |             | BRAF V600E r          | Antisense   | TAGTAACTCAGCAGCATCTCAGG     | 58.8                | –                          |       |                     |
| Human           | <i>KRAS</i> | Kras 46 Hr            | Antisense   | GCTGTATCGTCAAGGCACCTC       | 59.4                | 46                         |       |                     |
|                 |             | Kras 82 Hr            | Antisense   | TTGGATCATAATTCGTCCACAA      | 54.0                | 82                         |       |                     |
|                 |             | Kras 138 Hr           | Antisense   | CAAAGAATGGTCCCTGCACC        | 56.7                | 138                        |       |                     |
|                 |             | Kras 200 Hr           | Antisense   | TGAAAAATGGTCAGAGAAACCTT     | 54.7                | 200                        |       |                     |
|                 |             | Kras 250 Hr           | Antisense   | TGAAACCAAGGTACATTTCAG       | 56.5                | 250                        |       |                     |
|                 |             | Kras 300 Hr           | Antisense   | GAACATCATGGACCCTGACA        | 57.3                | 300                        |       |                     |
|                 |             | Kras 350 Hr           | Antisense   | TTCTACCCTCTCAGGAAACTCTG     | 60.6                | 355                        |       |                     |
|                 |             | Kras 400 Hr           | Antisense   | AAAGATTGTCTTTTAGGTCCAGATAGG | 60.4                | 390                        |       |                     |
|                 |             | KrasNonMutated Hf     | Sense       | GTAGTTGGAGCTGGTGGC          | 58.2                | –                          |       |                     |
|                 |             | Kras G13D Hf          | Sense       | GTAGTTGGAGCTGGTGA           | 52.8                | –                          |       |                     |
|                 |             | Kras G12V Hf          | Sense       | TTGTGGTAGTTGGAGCTGT         | 54.5                | –                          |       |                     |
|                 |             | Kras G12D Hf          | Sense       | TGTGGTAGTTGGAGCTGA          | 53.7                | –                          |       |                     |
|                 |             | Kras G12S Hf          | Sense       | ACTTGTGGTAGTTGGAGCTA        | 55.3                | –                          |       |                     |
|                 |             | Kras G12A Hf          | Sense       | TGTGGTAGTTGGAGCTGC          | 56.0                | –                          |       |                     |
|                 |             | Human                 | <i>BRAF</i> | Braf A1 conv k              | Sense               | TTATTGACTCTAAGAGGAAAGATGAA | 56.9  | 105                 |
|                 |             |                       |             | Braf A2 conv k              | Antisense           | GAGCAAGCATTATGAAGATTTAGG   | 59.7  | –                   |
|                 |             |                       |             | Braf V600E conv k           | Sense               | GATTTTGGTCTAGCTACAGA       | 53.2  | 97                  |
|                 |             |                       |             | Braf B2 conv k              | Antisense           | TAGCCTCAATTCTACCATCCACA    | 59.3  | –                   |
|                 |             |                       |             | Braf blocker                | Sense               | GCTACAGTGAAAATCTCGATGG-PHO | –     | –                   |
|                 |             |                       |             | Human                       | <i>KRAS</i>         | Kras A1 inv k              | Sense | GCCTGCTGAAAATGACTGA |
| Kras G12D Inv k | Antisense   | CTCTTGCCTACGCCAT      | 51.7        |                             |                     | –                          |       |                     |
| Kras G12A Inv k | Antisense   | CTCTTGCCTACGCCAG      | 54.3        |                             |                     | –                          |       |                     |
| Kras G12S Inv k | Antisense   | TCTTGCCTACGCCACT      | 51.7        |                             |                     | 60                         |       |                     |
| Kras G12C Inv k | Antisense   | TCTTGCCTACGCCACA      | 51.7        |                             |                     | –                          |       |                     |
| Kras G13D Inv k | Antisense   | GCACTCTTGCCTACGT      | 51.7        |                             |                     | 64                         |       |                     |
| Kras G12V Inv k | Antisense   | CTCTTGCCTACGCCAA      | 51.7        |                             |                     | 61                         |       |                     |
| Kras B1 inv k   | Sense       | CCTTGGGTTTCAAGTTATATG | 54.0        |                             |                     | 67                         |       |                     |
| Kras B2 inv k   | Antisense   | CCCTGACATACTCCCAAGGA  | 59.4        |                             |                     | –                          |       |                     |
| Kras blocker    | Antisense   | GCCTACGCCACCAGCTC-PHO | –           |                             |                     | –                          |       |                     |

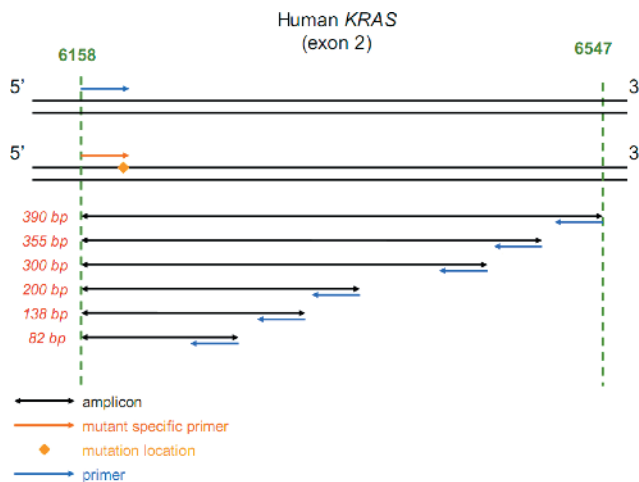

**Figure W1.** Design of the primers used for the ccfDNA size distribution study.

**Table W3.** Numerical Values of ccfDNA Quantification Obtained in the Xenografted Mice Experiments.

| Mouse No. | mWT    | hWT   | hKRASm | hBRAFm | Tumor Weight (mg) |
|-----------|--------|-------|--------|--------|-------------------|
| 1         | 6.336  | ND    | ND     | ND     | 0                 |
| 2         | 6.627  | ND    | ND     | ND     | 0                 |
| 3         | 13.079 | 0.056 | ND     | ND     | 0                 |
| 4         | 4.551  | ND    | 0.066  | ND     | 72.4              |
| 5         | 11.802 | 1.381 | 4.068  | ND     | 89.8              |
| 6         | 8.29   | 3.644 | 4.304  | 0.201  | 174.8             |
| 7         | 3.746  | 2.516 | 1.729  | ND     | 311.1             |
| 8         | 9.224  | 2.608 | 2.409  | ND     | 358               |
| 9         | 6.776  | 1.586 | 6.102  | 0.131  | 465               |
| 10        | 5.826  | 8.456 | 7.493  | 0.155  | 543               |
| 11        | 9.047  | 9.047 | 12.531 | 0.235  | 1200              |

Data are expressed as ng/ml plasma.  
ND, not determined.

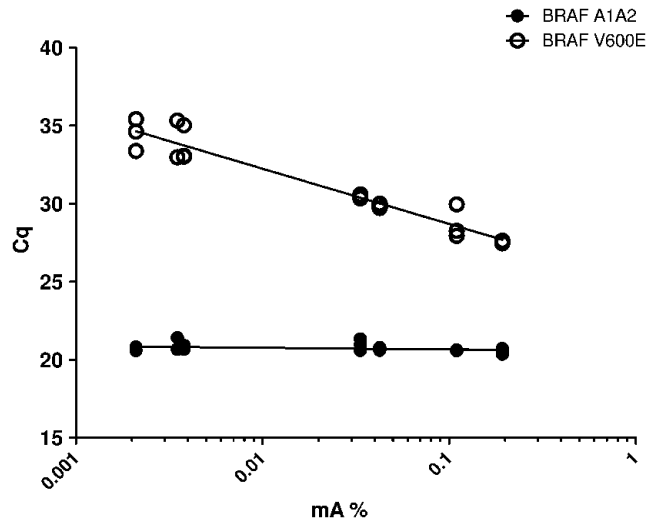

**Figure W2.** Analysis of the sensitivity of the method for detecting BRAF V600E point mutation. mA% represents the estimated mutation load and Cq represents the quantification cycle when the amplified amplicon is detected during the Q-PCR experiment. Each point corresponds to a specific amplification of the targeted sequence as determined by melting analysis. DNA from HT29 cells harboring a specific mutation was serially diluted six times into high concentrated WT genomic DNA from human placenta up to dilution of 0.2 mutated copies in 20,000 copies (1/100,000 ratio). Assay is carried in triplicate determination.
